# Supplementary material for: Association of Life’s Simple 7 lifestyle metric with cardiometabolic disease-free life expectancy in older British men
Source: Springer Nature journal article supplement (doi:10.1038/s43856-024-00534-7), 2024-06-04
Supplement: MOESM2 [file 43856_2024_534_MOESM2_ESM.pdf]

## Supplementary Information

### Supplementary Table 1.

Life's Simple 7 metric definitions of poor, intermediate, and ideal for men participating in the British Regional Heart Study.

| LS7 Metric                          | Poor              | Intermediate                                | Ideal                             |
|-------------------------------------|-------------------|---------------------------------------------|-----------------------------------|
| BMI, kg/m <sup>2</sup>              | ≥ 30              | 25-30                                       | < 25                              |
| Blood pressure, mmHg                | SBP≥140 or DBP≥90 | SBP 120-140 or DBP 80-90 or treated to goal | SBP < 120, DBP < 80 and untreated |
| Blood glucose <sup>a</sup> , mmol/L | N/A               | 5.6-7.0 or treated to goal                  | < 5.6 and untreated               |
| Total cholesterol, mmol/L           | ≥ 6.2             | 5.2-6.2                                     | < 5.2                             |
| Smoking                             | Current smoking   | Gave up ≤ 5 years                           | Never or gave up > 5 years        |
| Physical activity <sup>b</sup>      | Inactive          | Occasional to light activity                | Moderate to vigorous activity     |
| Diet <sup>c</sup>                   | EDI score 12-23   | EDI score 24-26                             | EDI score 27-35                   |

<sup>a</sup> Blood glucose ≥ 7.0 mmol/L was defined as screen-detected type 2 diabetes.

<sup>b</sup> Physical activity level was derived based on the frequency and type (intensity) of self-reported usual pattern of physical activity, including regular walking or cycling, recreational, and sporting (vigorous) activity. In specific, based on the frequency and type (intensity), the self-reported physical activity information was firstly summarized into a score based on the recommendations of a National Heart, lung, and Blood Institute workshop and the Minnesota intensity codes<sup>30,31</sup>, and then the scores were grouped into six broad categories: 0-2 inactive; 3-5 occasional activity; 6-8 light activity; 9-12 moderate activity; 13-20 moderately vigorous activity; and ≥ 21 vigorous activity. The LS7 physical activity metric was created by further categorizing inactive as poor; occasional to light as intermediate; and moderate to vigorous activity as ideal.

<sup>c</sup> Diet was assessed by the Elderly Dietary Index (EDI) score, which is a dietary score that developed specifically to address older adults' adherence to the nutritional recommendations<sup>27</sup>. The EDI consists of 9 components (fruit, vegetables, meat, fish/seafood, cereals, legumes, bread, olive oil, and dairy). Each component was assigned a 4-point scoring system based on the consumption frequency (1, 2, 3, 4, 5, 6, or 7 days/wk; monthly; or rarely/never). This resulted in a total EDI score range from 9 to 36, with higher scores indicating a presumably healthier diet. The LS7 diet metric was derived by categorizing participants into tertiles of EDI scores: 12-23 (poor); 24-26 (intermediate); and 27-35 (ideal).

BMI = body mass index; DBP = diastolic blood pressure; EDI = elderly diet index; SBP = systolic blood pressure.

### Supplementary Table 2.

Comparison of complete cases and missing sample, among BRHS participants free of prevalence cardiometabolic diseases at Q20 (n=3167).

| Variable               | Complete cases<br>(n=2662) | Missing sample<br>(n=505) | p-value |
|------------------------|----------------------------|---------------------------|---------|
| CMD/Death events (%)   | 1764 (66.3)                | 390 (77.2)                |         |
| Incidence / 1000PY     | 33.1                       | 38.6                      |         |
| Age at baseline, years | 68.2 (5.5)                 | 69.7 (5.8), N = 505       | < 0.01  |
| Social Class           |                            | N = 505                   | < 0.01  |
| Manual                 | 45.7                       | 51.3                      |         |
| Non-manual             | 50.6                       | 41.2                      |         |
| Unspecified            | 3.8                        | 7.5                       |         |

|                   |                |                         |        |
|-------------------|----------------|-------------------------|--------|
| Alcohol Intake    |                | N = 505                 | < 0.01 |
| None              | 8.7            | 13.9                    |        |
| Occasional        | 25.9           | 24.4                    |        |
| Light             | 44.9           | 40.8                    |        |
| Moderate          | 16.2           | 12.3                    |        |
| Heavy             | 2.8            | 4.2                     |        |
| Unspecified       | 1.5            | 4.6                     |        |
| Energy Intake     | 2152.8 (519.0) | 2059.9 (575.5), N = 414 | < 0.01 |
| BMI               |                | N = 496                 | < 0.01 |
| Poor              | 13.7           | 20.6                    |        |
| Intermediate      | 53.2           | 51.2                    |        |
| Ideal             | 33.1           | 28.2                    |        |
| Blood Pressure    |                | N = 473                 | 0.63   |
| Poor              | 40.8           | 40.4                    |        |
| Intermediate      | 51.6           | 50.7                    |        |
| Ideal             | 7.6            | 8.9                     |        |
| Blood Glucose     |                | N = 354                 | 0.84   |
| Intermediate      | 46.6           | 47.2                    |        |
| Ideal             | 53.4           | 52.8                    |        |
| Total Cholesterol |                | N = 356                 | 0.07   |
| Poor              | 45.8           | 39.9                    |        |
| Intermediate      | 36.3           | 38.5                    |        |
| Ideal             | 17.8           | 21.6                    |        |
| Smoking           |                | N = 499                 | 0.61   |
| Poor              | 13.0           | 14.6                    |        |
| Intermediate      | 2.6            | 2.6                     |        |
| Ideal             | 84.4           | 82.8                    |        |
| Physical Activity |                | N = 401                 | < 0.01 |
| Poor              | 8.7            | 12.2                    |        |
| Intermediate      | 41.0           | 47.4                    |        |
| Ideal             | 50.3           | 40.4                    |        |
| Diet              |                | N = 273                 | 0.06   |
| Poor              | 38.7           | 45.8                    |        |
| Intermediate      | 37.2           | 34.8                    |        |
| Ideal             | 24.0           | 19.4                    |        |

Values are presented as Mean (SD) or percentage unless stated otherwise.

Pearson Chi-squared test was used for all categorical variables.

Wilcoxon rank sum test was used for all continuous variables.

BMI = body mass index; CMD = cardiometabolic disease; LS7 = Life's Simple 7.

### Supplementary Table 3.

The Hazard Ratios (HRs) of the associations between Life's Simple 7 adherence and risk of cardiometabolic diseases/death in BRHS participants aged 60-79 in 1998-2000, after imputing missing covariates (n=3167).

| LS7 Adherence                                   | HR   | 95% CI       | p-value |
|-------------------------------------------------|------|--------------|---------|
| Poor<br>(Achieved 0-1 LS7 ideal levels)         | Ref  | -            | < 0.01  |
| Intermediate<br>(Achieved 2-3 LS7 ideal levels) | 0.72 | (0.64, 0.81) |         |
| Ideal<br>(Achieved 4+ LS7 ideal levels)         | 0.57 | (0.49, 0.66) |         |

Models used age as time scale, and adjusted for social class, alcohol intake, and energy intake.

LS7 = Life's Simple 7.

**Supplementary Table 4.**

The Hazard Ratios (HRs) of the associations between Life's Simple 7 adherence and risk of cardiometabolic diseases/death in BRHS participants aged 60-79 in 1998-2000, further adjusted for IMD (n=2662).

| LS7 Adherence                                   | HR   | 95% CI       | p-value |
|-------------------------------------------------|------|--------------|---------|
| Poor<br>(Achieved 0-1 LS7 ideal levels)         | Ref  | -            | < 0.01  |
| Intermediate<br>(Achieved 2-3 LS7 ideal levels) | 0.74 | (0.65, 0.84) |         |
| Ideal<br>(Achieved 4+ LS7 ideal levels)         | 0.59 | (0.51, 0.70) |         |

IMD: National index of Multiple Deprivation (IMD).

Models used age as time scale, and adjusted for social class, alcohol intake, energy intake, and IMD. LS7 = Life's Simple 7.

**Supplementary Table 5.**

The Hazard Ratios (HRs) of the associations between Life's Simple 7 adherence and risk of cardiometabolic diseases/death in BRHS participants aged 60-79 in 1998-2000, further adjusted for baseline prevalent cancer status (n=2662).

| LS7 Adherence                                   | HR   | 95% CI       | p-value |
|-------------------------------------------------|------|--------------|---------|
| Poor<br>(Achieved 0-1 LS7 ideal levels)         | Ref  | -            | < 0.01  |
| Intermediate<br>(Achieved 2-3 LS7 ideal levels) | 0.73 | (0.64, 0.83) |         |
| Ideal<br>(Achieved 4+ LS7 ideal levels)         | 0.58 | (0.50, 0.68) |         |

Models used age as time scale, and adjusted for social class, alcohol intake, energy intake, and baseline prevalent cancer status. LS7 = Life's Simple 7.

**Supplementary Table 6.**

Cardiometabolic disease-free life expectancy and years of cardiometabolic disease-free life gained at age 60 for BRHS participants by Life's Simple 7 adherence (n=2662)

| LS7 Adherence                                             | Cardiometabolic disease-free life expectancy at 60 y |              | Years of cardiometabolic disease-free life gained at 60 y |            |
|-----------------------------------------------------------|------------------------------------------------------|--------------|-----------------------------------------------------------|------------|
|                                                           | Years                                                | 95% CI       | Years                                                     | 95% CI     |
| Poor<br>(Achieved 0-1 LS7 ideal levels, n = 403)          | 18.42                                                | 16.93, 19.90 | Ref                                                       | -          |
| Intermediate<br>(Achieved 2-3 LS7 ideal levels, n = 1630) | 20.95                                                | 19.64, 22.25 | 2.53                                                      | 1.44, 3.62 |
| Ideal<br>(Achieved 4+ LS7 ideal levels, n = 629)          | 22.79                                                | 21.27, 24.31 | 4.37                                                      | 2.95, 5.79 |

Models used age as time scale, and adjusted for social class, alcohol intake, and energy intake. LS7, Life's Simple 7.

**Supplementary Table 7.**

Cardiometabolic disease-free life expectancy and years of cardiometabolic disease-free life gained at age 60 for BRHS participants by Life's Simple 7 adherence, stratified by social class.

| Manual workers<br>(N = 1216)                                | Cardiometabolic disease-free life expectancy at 60 y |              | Years of cardiometabolic disease-free life gained at 60 y |            |
|-------------------------------------------------------------|------------------------------------------------------|--------------|-----------------------------------------------------------|------------|
|                                                             | Years                                                | 95% CI       | Years                                                     | 95% CI     |
| LS7 Adherence                                               |                                                      |              |                                                           |            |
| Poor<br>(Achieved 0-1 LS7 ideal levels,<br>n = 238)         | 17.19                                                | 15.19, 19.20 | Ref                                                       | -          |
| Intermediate<br>(Achieved 2-3 LS7 ideal levels,<br>n = 729) | 19.88                                                | 18.04, 21.71 | 2.68                                                      | 1.18, 4.19 |
| Ideal<br>(Achieved 4+ LS7 ideal levels,<br>n = 229)         | 21.65                                                | 19.39, 23.91 | 4.46                                                      | 2.38, 6.53 |

  

| Non-manual workers<br>(N = 1346)                            | Cardiometabolic disease-free life expectancy at 60 y |              | Years of cardiometabolic disease-free life gained at 60 y |            |
|-------------------------------------------------------------|------------------------------------------------------|--------------|-----------------------------------------------------------|------------|
|                                                             | Years                                                | 95% CI       | Years                                                     | 95% CI     |
| LS7 Adherence                                               |                                                      |              |                                                           |            |
| Poor<br>(Achieved 0-1 LS7 ideal levels,<br>n = 151)         | 20.14                                                | 17.06, 23.23 | Ref                                                       | -          |
| Intermediate<br>(Achieved 2-3 LS7 ideal levels,<br>n = 818) | 22.21                                                | 19.25, 25.18 | 2.06                                                      | 0.30, 3.82 |
| Ideal<br>(Achieved 4+ LS7 ideal levels,<br>n = 377)         | 24.26                                                | 21.17, 27.36 | 4.12                                                      | 1.88, 6.35 |

Models used age as time scale and adjusted for alcohol intake and energy intake.  
LS7, Life's Simple 7.

**Supplementary Table 8.**

Cardiometabolic disease-free life expectancy and years of cardiometabolic disease-free life gained at age 60 for BRHS participants by each Life's Simple 7 lifestyle metric (n=2662)

| LS7 lifestyle metric              | Cardiometabolic disease-free life expectancy at 60 y |              | Years of cardiometabolic disease-free life gained at 60 y |             |
|-----------------------------------|------------------------------------------------------|--------------|-----------------------------------------------------------|-------------|
|                                   | Years                                                | 95% CI       | Years                                                     | 95% CI      |
| <b>BMI</b>                        |                                                      |              |                                                           |             |
| Poor (n = 365)                    | 18.82                                                | 17.29, 20.35 | Ref                                                       | -           |
| Intermediate (n = 1417)           | 21.28                                                | 19.95, 22.60 | 2.46                                                      | 1.29, 3.63  |
| Ideal (n = 880)                   | 21.34                                                | 19.94, 22.74 | 2.53                                                      | 1.28, 3.77  |
| <b>Blood Pressure</b>             |                                                      |              |                                                           |             |
| Poor (n = 1087)                   | 19.89                                                | 18.54, 21.23 | Ref                                                       | -           |
| Intermediate (n = 1373)           | 21.40                                                | 20.06, 22.74 | 1.52                                                      | 0.69, 2.35  |
| Ideal (n = 202)                   | 22.98                                                | 20.97, 24.99 | 3.10                                                      | 1.37, 4.82  |
| <b>Blood Glucose <sup>a</sup></b> |                                                      |              |                                                           |             |
| Intermediate (n = 1241)           | 20.56                                                | 19.23, 21.89 | Ref                                                       | -           |
| Ideal (n = 1421)                  | 21.23                                                | 19.90, 22.57 | 0.67                                                      | -0.11, 1.45 |
| <b>Total Cholesterol</b>          |                                                      |              |                                                           |             |
| Poor (n = 1220)                   | 20.96                                                | 19.62, 22.30 | Ref                                                       | -           |
| Intermediate (n = 967)            | 21.00                                                | 19.61, 22.38 | 0.04                                                      | -0.82, 0.89 |

|                           |       |              |       |             |
|---------------------------|-------|--------------|-------|-------------|
| Ideal (n = 475)           | 20.65 | 19.12, 22.18 | -0.31 | -1.37, 0.76 |
| <b>Smoking</b>            |       |              |       |             |
| Poor (n = 346)            | 17.73 | 16.25, 19.22 | Ref   | -           |
| Intermediate (n = 70)     | 16.95 | 14.63, 19.27 | -0.78 | -2.98, 1.42 |
| Ideal (n = 2246)          | 21.65 | 20.38, 22.92 | 3.92  | 2.74, 5.10  |
| <b>Physical Activity</b>  |       |              |       |             |
| Poor (n = 232)            | 17.25 | 15.61, 18.88 | Ref   | -           |
| Intermediate (n = 1092)   | 20.36 | 19.00, 21.71 | 3.11  | 1.75, 4.46  |
| Ideal (n = 1338)          | 22.10 | 20.74, 23.45 | 4.84  | 3.37, 6.32  |
| <b>Elderly Diet Index</b> |       |              |       |             |
| Poor (n = 1031)           | 19.81 | 18.46, 21.16 | Ref   | -           |
| Intermediate (n = 991)    | 21.30 | 19.90, 22.69 | 1.48  | 0.58, 2.39  |
| Ideal (n = 640)           | 22.42 | 20.90, 23.93 | 2.61  | 1.48, 3.73  |

<sup>a</sup> Participants with poor glucose status were diabetic and excluded from the analysis.

Models used age as time scale, and adjusted for social class, alcohol intake, and energy intake. BMI = body mass index; LS7 = Life's Simple 7.

### Supplementary Figure 1.

Correlation matrix for Life's Simple 7 metrics

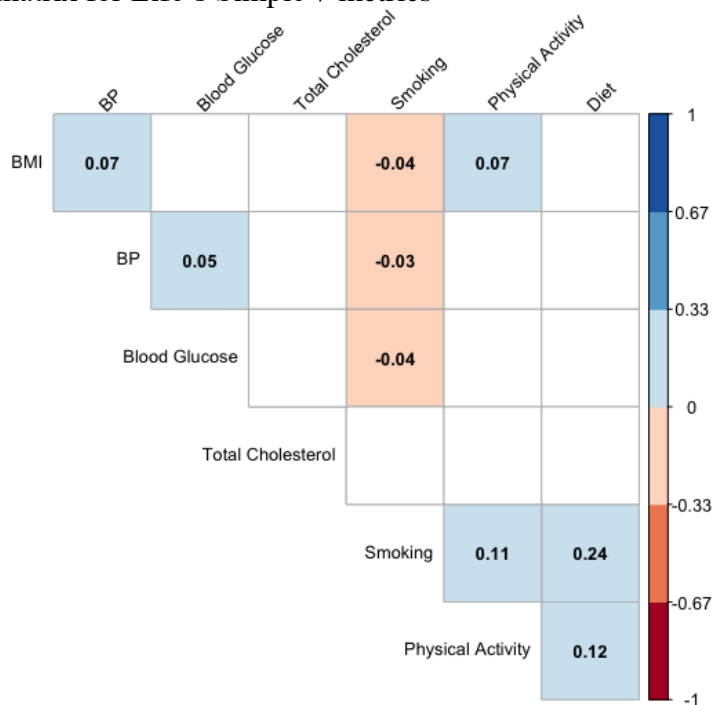

Spearman's rank correlation was used to measure the associations between each pair of LS7 metrics. Only significant correlation coefficients (p-value < 0.05) were kept in the figure. BMI = body mass index; BP = blood pressure.

### Supplementary Figure 2.

The Hazard Ratios and 95% Confidence Intervals of the associations between individual Life's Simple 7 metrics and risk of cardiometabolic diseases/death in BRHS participants aged 60-79 in 1998-2000 (n=2662).

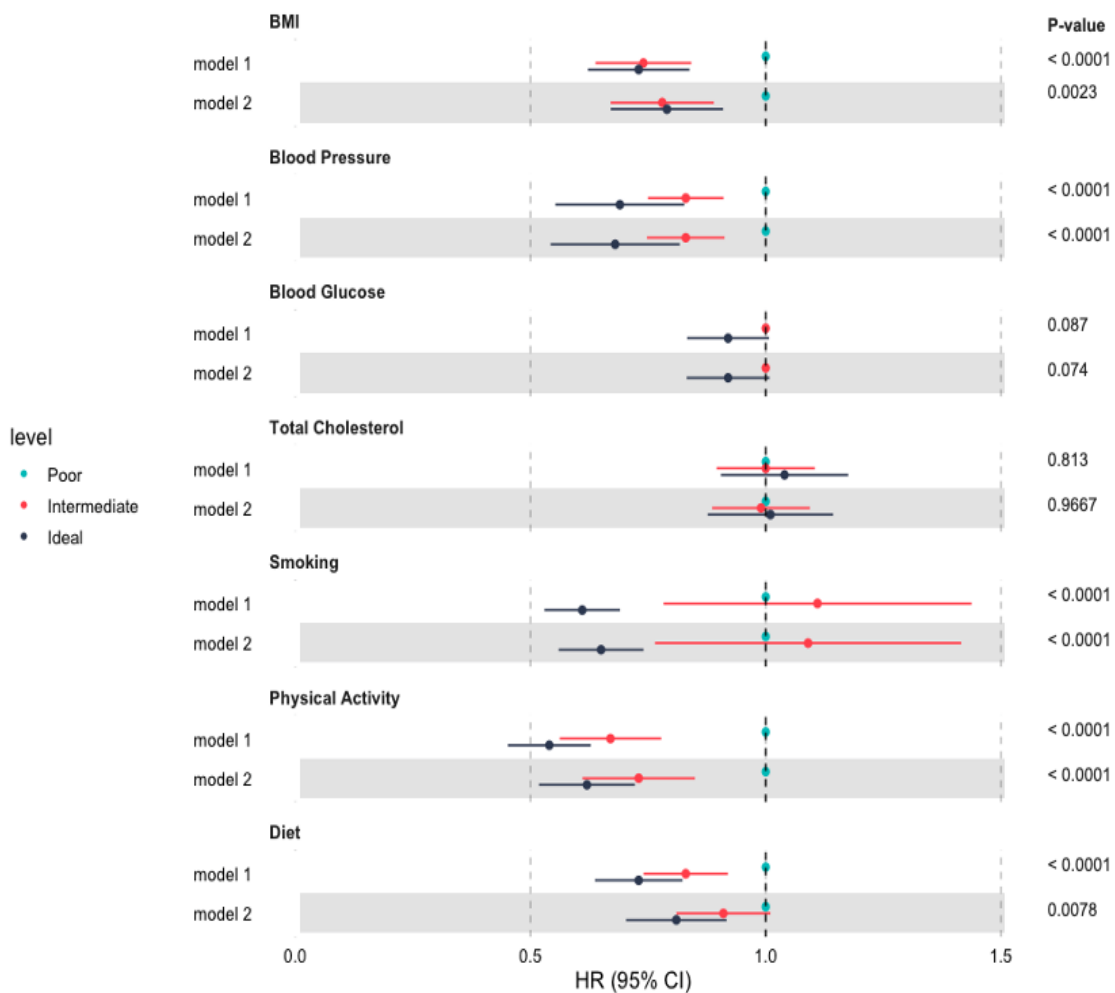

Model 1 used age as time scale and adjusted for social class, alcohol intake, and total energy intake. Model 2 used age as time scale and adjusted for social class, alcohol intake, total energy intake, and other LS7 factors.  
 BMI = body mass index.
